# Supplementary material for: Assessing population structure and morpho-molecular characterization of sunflower (Helianthus annuus L.) for elite germplasm identification
Source: PeerJ. 2024 Oct 31;12:e18205. doi: 10.7717/peerj.18205 (PMC11531741; doi:10.7717/peerj.18205)
Supplement: Data S1 [file peerj-12-18205-s001.xlsx]

## Sheet: Sheet1
	ORS8-250	ORS8-450	ORS148-200	ORS148-220	ORS185-300	ORS185-320	ORS185-400	ORS185-420	ORS200-310	ORS200-520	ORS203-200	ORS203-220	ORS244-160	ORS244-220	ORS244-240	ORS244-420	ORS307-160	ORS307180	ORS309-140	ORS309-160	ORS309-220	ORS310-180	ORS310-200	ORS310-220	ORS317-200	ORS317-240	ORS321-180	ORS321-320	ORS321-920	ORS328-320	ORS328-330	ORS323-390	ORS323-420	ORS331-320	ORS331-400	ORS331-420	ORS333-200	ORS333-350	ORS333-370	ORS334-310	ORS334-330	ORS337-200	ORS337-210	ORS342-210	ORS342-230	ORS351-290	ORS351-300	ORS358-120	ORS358-200
ARM 248B	1	1	0	1	1	1	1	1	1	0	0	0	1	1	0	0	0	1	0	1	0	1	0	0	1	0	1	1	0	0	0	0	1	1	0	0	1	0	1	0	1	1	0	0	0	0	1	0	0
COSF 6B ©	0	1	1	0	1	1	1	1	1	0	0	0	1	1	0	0	0	0	0	1	0	0	1	0	1	0	1	1	0	0	0	0	1	0	0	0	1	0	1	0	1	0	1	1	0	1	0	1	0
GMU 1181	1	1	0	1	1	0	0	0	0	0	0	1	1	1	0	0	0	0	1	1	0	1	0	0	1	0	1	1	0	0	0	1	1	0	0	0	0	1	1	0	1	0	1	1	0	0	1	1	1
RHA 102	1	1	0	1	0	1	0	0	1	0	0	1	1	1	0	0	1	1	0	1	0	0	1	0	1	1	1	1	1	0	0	0	1	0	1	0	0	0	1	1	0	0	1	1	0	0	0	1	1
CMS 1103B	1	1	0	1	0	0	1	0	1	0	0	1	1	1	1	0	1	0	0	0	0	1	0	0	1	0	1	1	0	0	0	0	1	1	0	0	0	0	1	0	1	0	1	1	0	0	1	1	1
GMU 780	0	1	1	1	1	0	0	0	1	0	0	1	1	1	0	0	0	0	1	0	0	0	1	1	0	0	0	1	0	0	0	0	1	1	1	0	0	0	1	0	1	1	0	0	0	0	1	1	0
CMS 335B	1	1	0	1	1	1	0	1	1	0	1	0	1	1	0	1	0	0	0	0	0	0	1	1	1	0	1	1	0	0	0	1	1	1	1	0	1	1	1	0	1	0	1	1	0	0	1	0	0
RCR 72	1	1	1	1	1	1	0	0	1	0	1	0	1	1	0	0	0	0	1	0	0	0	1	1	1	0	1	1	0	1	0	0	1	0	0	0	0	0	1	0	1	0	1	1	0	0	0	1	0
CMSNDCMS2B	0	0	1	1	0	0	0	0	1	0	0	0	1	1	0	0	0	0	0	0	0	0	0	0	1	0	1	1	0	0	1	0	1	1	0	0	0	0	1	0	1	0	1	1	0	0	1	0	0
GMU 344	0	0	1	1	1	1	0	0	1	1	0	0	1	1	0	0	0	0	1	0	1	0	1	0	1	0	0	0	0	1	0	1	1	1	1	1	0	1	1	0	1	0	1	1	0	0	1	0	0
CSFI 99 ©	0	0	0	1	1	1	0	0	0	0	0	0	1	1	0	0	0	0	0	1	0	1	0	0	1	0	0	1	0	0	0	0	1	0	0	0	0	0	1	0	1	0	1	0	0	0	1	0	0
RHA 272-1	0	0	0	1	0	0	0	0	0	0	0	0	1	1	0	0	0	0	0	1	0	0	1	0	1	0	1	1	1	0	0	1	1	0	0	0	0	1	1	0	1	0	1	1	0	0	1	0	0
GMU 336	1	1	1	1	1	1	1	1	1	0	0	1	1	1	0	1	1	1	1	0	0	0	1	0	1	0	0	0	0	0	0	1	1	1	0	0	0	1	1	0	1	0	1	1	0	0	1	1	0
RHA GPR 58	1	1	1	1	0	0	0	0	1	0	0	1	1	1	0	0	0	0	1	0	0	0	1	0	1	0	1	1	0	0	0	0	1	1	1	1	0	0	1	0	1	0	1	1	0	0	1	1	0
CMS 911B	1	1	1	1	1	1	1	1	1	0	0	1	1	1	1	1	0	0	1	0	0	0	1	1	1	0	0	0	0	1	0	0	1	1	1	1	0	0	1	1	0	0	1	1	0	1	0	1	0
GMU 477	1	1	1	1	0	0	0	0	0	0	0	0	0	1	0	0	0	0	1	0	0	0	1	1	1	0	0	1	0	0	0	0	1	1	1	0	0	0	1	0	1	0	1	1	0	0	1	1	0
GMU 450	1	1	1	1	1	1	1	0	1	0	0	1	1	1	0	0	0	0	1	0	0	0	1	0	1	0	1	1	0	0	0	0	1	1	1	0	0	0	1	1	0	0	1	1	0	0	0	1	0
PM 95	1	1	0	1	1	1	1	0	1	0	1	0	1	1	0	0	1	1	1	0	0	1	0	0	1	0	0	1	0	0	0	0	1	1	1	0	0	0	1	0	1	0	1	1	0	0	1	1	0
GMU 428	1	1	0	1	1	0	0	0	1	0	1	0	1	1	0	0	0	0	1	0	0	1	0	0	1	0	1	1	0	0	0	0	1	0	0	0	0	0	1	0	1	0	1	1	0	1	0	1	0
GMU 411	1	1	0	0	1	1	0	0	1	0	0	1	1	1	0	0	0	0	1	0	0	0	1	0	1	0	0	1	0	0	1	0	1	1	0	0	0	0	1	0	1	0	1	1	0	0	1	0	0
GMU 741	0	0	1	1	1	1	1	0	1	0	0	0	1	1	1	0	0	0	1	0	0	0	1	1	1	0	0	1	0	0	0	1	1	0	0	0	0	0	1	0	1	0	1	1	0	0	1	0	0
CMS 108B	0	0	0	0	0	0	0	0	1	0	0	1	1	1	0	0	1	0	1	0	0	0	1	0	1	0	0	1	0	0	0	1	1	0	0	0	0	1	1	0	1	1	0	1	0	1	0	0	0
COSFV 5	0	0	0	1	0	0	0	0	1	0	0	1	1	1	0	0	0	0	1	0	0	0	1	1	1	0	0	0	0	0	0	0	1	1	1	0	0	1	0	0	1	0	1	0	0	0	1	0	0
GMU 734	0	0	0	1	0	0	0	0	1	0	0	1	1	1	0	0	1	1	0	1	0	0	1	0	1	0	0	0	0	0	0	1	1	1	0	0	0	1	1	0	1	0	1	0	0	0	1	0	0
ARM 240B	1	0	1	1	1	1	0	0	1	0	0	1	1	1	0	0	1	0	0	1	0	1	0	0	1	0	1	1	0	0	0	0	1	0	0	0	0	0	1	0	1	0	1	1	0	0	1	0	0
CMS 597B	1	1	1	1	1	0	0	0	1	0	0	1	1	1	0	0	1	1	0	1	0	0	1	0	1	0	1	1	0	0	0	0	1	0	0	0	0	0	1	0	1	0	1	1	0	1	0	1	1
HOCL 6R	1	1	0	1	0	0	0	0	1	0	0	0	1	1	0	0	0	0	0	0	0	1	0	0	0	0	1	1	0	0	0	0	1	0	1	0	0	1	1	0	1	0	1	1	0	0	1	0	0
RHA GPR 110	1	1	0	1	0	0	0	0	1	0	0	1	1	1	0	0	0	0	1	0	0	0	1	0	0	0	1	1	0	0	0	0	1	1	0	0	1	0	1	0	1	0	1	1	0	0	0	1	0
IB 80	1	0	0	1	0	0	0	0	1	0	0	1	1	1	0	0	1	0	1	1	0	1	0	0	1	1	0	1	0	0	0	0	1	1	1	0	1	0	1	0	1	0	1	1	0	0	1	0	0
CMS 107B	1	1	0	1	0	0	0	0	1	0	1	1	1	1	0	0	1	0	0	1	0	0	1	1	1	0	1	1	0	0	0	0	1	1	1	0	0	0	1	0	1	0	1	1	0	0	1	0	0
PM 36	1	1	0	1	0	0	0	0	1	0	1	0	1	1	0	0	1	0	0	1	0	0	1	1	1	0	0	1	0	0	0	0	1	0	0	0	0	1	1	0	1	0	1	1	0	0	1	0	0
IL 77	1	1	0	1	1	0	0	0	1	0	0	1	1	1	0	0	1	1	0	1	0	0	1	1	1	0	1	1	0	0	0	0	1	1	0	0	0	0	1	0	1	0	1	1	0	0	0	0	0
RHA95-C-10	1	1	0	1	0	0	0	0	1	0	0	1	0	1	0	0	1	1	1	0	0	0	0	0	1	0	0	1	0	0	0	0	1	1	1	1	0	0	1	0	1	0	1	1	0	0	1	0	0
IL84	1	0	0	1	1	1	0	0	1	0	0	1	1	1	0	0	1	1	0	1	0	0	1	0	1	0	0	1	0	0	0	0	1	0	0	0	0	1	1	0	1	1	0	1	0	0	1	1	1
RHA 278	1	1	0	1	1	1	0	0	1	0	0	1	1	1	0	0	1	1	1	1	0	1	0	0	1	0	0	1	0	1	1	0	1	0	0	0	0	0	1	0	1	1	0	1	0	0	1	1	0
RHA 273	1	1	0	1	1	1	1	1	1	1	1	1	1	1	1	0	1	1	1	0	0	0	1	0	1	1	0	0	0	1	0	0	1	1	0	0	1	1	1	0	1	0	1	1	0	0	1	1	1
RHA 857	1	1	0	1	1	1	0	0	1	1	0	1	1	1	0	0	1	1	1	0	0	0	1	0	1	0	0	0	0	0	0	0	1	1	1	1	0	1	1	0	1	1	0	1	1	0	1	1	1
GMU 755	1	1	0	1	0	1	0	0	1	0	1	0	1	1	0	0	1	1	1	0	0	0	1	0	1	0	0	0	0	0	0	0	1	1	1	1	0	0	1	0	1	0	1	1	0	0	1	0	0
PM 53	1	1	1	1	0	0	0	0	1	1	1	0	0	1	0	0	1	0	1	0	0	0	1	1	0	0	0	1	0	1	0	0	1	1	1	0	0	0	1	0	1	0	1	1	0	1	0	0	1
GP6 912	1	1	1	1	0	0	0	0	1	0	0	1	1	1	0	0	1	1	0	1	0	0	1	1	0	0	0	1	0	1	0	0	1	1	1	0	0	0	1	0	1	0	1	1	0	0	1	0	0
CMS 135B	0	0	0	1	0	1	0	0	1	0	1	1	1	1	0	0	1	1	0	1	0	0	1	0	1	0	0	1	0	1	0	0	1	1	1	0	0	0	1	0	1	0	1	1	0	0	0	0	1
REC 431	1	1	0	1	0	1	0	0	1	0	0	1	1	1	0	0	0	0	0	1	0	1	0	0	0	0	1	1	0	0	0	0	1	0	0	0	0	0	1	0	1	0	1	1	0	0	1	1	0
GMU 325	1	1	0	1	0	0	0	0	1	0	0	1	1	1	1	0	1	1	0	1	0	1	0	0	1	0	0	0	0	0	0	1	1	1	0	0	0	0	1	0	1	0	1	1	0	1	0	0	0
GP6 1089	1	1	0	1	0	0	0	0	1	0	0	1	1	1	1	0	0	1	1	0	0	0	1	0	1	0	0	1	0	0	0	1	1	0	0	0	0	0	1	0	1	0	1	1	0	0	1	0	1
RHA 378	1	1	0	1	0	1	0	0	1	0	0	1	1	1	0	0	1	1	1	0	0	0	1	1	1	0	1	1	0	0	1	0	1	0	0	0	0	1	1	0	1	0	1	1	0	0	1	1	0
PM 65	1	0	0	1	1	1	0	0	1	0	1	1	1	1	0	0	1	0	0	1	0	0	1	0	1	1	0	0	0	1	0	0	1	1	1	0	0	0	1	0	1	0	1	1	0	1	0	1	1
RHA GMU 755	1	1	0	1	1	0	0	0	1	0	0	1	1	1	1	0	1	0	0	1	0	0	1	1	1	0	0	0	0	1	0	0	1	0	0	0	0	0	0	1	0	0	1	1	0	0	1	0	0
COSF 13B ©	1	1	1	1	1	1	0	0	1	0	0	1	1	1	1	0	1	1	0	1	0	0	1	0	0	0	0	1	0	1	0	0	1	0	0	0	0	1	1	0	1	1	0	1	0	0	1	1	0
[truncated: 218 more columns]
