# Supplementary material for: Assessing population structure and morpho-molecular characterization of sunflower (Helianthus annuus L.) for elite germplasm identification
Source: PeerJ. 2024 Oct 31;12:e18205. doi: 10.7717/peerj.18205 (PMC11531741; doi:10.7717/peerj.18205)
Supplement: Data S2 [file peerj-12-18205-s002.xlsx]

## Sheet: Sheet1
	Entry	Days to 50% flowering	Days to Maturity	Plant height (cm)	Head diameter (cm)	Hun. Seed (g)	Vol. weight /100ml (g)	Oil content (%)	Yield /plant (g)	Oil yild per plant
Block 1
1	ARM 248B	58	90	115.4	12.2	3.4	32.8	31.7	20.5	6.4985
2	COSF 6B ©	62	96	120.1	10.33	5	27.3	39.6	19.7	7.8012
3	GMU 1181	57	89	165.5	13.7	5.1	30.7	30	21	6.3
4	RHA 102	50	82	137.9	14.3	4.4	28.6	30.5	25.5	7.7775
5	CMS 1103B	58	90	130.3	14.2	4.7	26	29.3	26.5	7.7645
6	GMU 780	55	87	126.7	11.8	3.9	28.2	32.3	18	5.814
7	CSFI 99 ©	62	96	145.03	12.56	2.8	33	36	14.7	5.292
8	CMS 335B	55	87	127.7	9.6	2.7	29.6	32.5	16.5	5.3625
9	RCR 72	61	93	139.5	8.8	3.1	33.8	35	16	5.6
10	CMSNDCMS2B	56	88	77.1	7.8	2.3	35	39.3	16.5	6.4845
11	GMU 344	59	91	165.5	9.1	5.5	36.4	33	15.5	5.115
12	RHA 272-1	58	90	158	11.3	3.8	28.5	30.3	18	5.454
13	GMU 336	58	90	176	13.1	3.6	29.4	27.3	24.2	6.6066
14	RHA GPR 58	57	89	137.5	14	4.9	30.7	35.7	25.8	9.2106
15	COSFV 5	63	97	108.8	14.56	5	35.5	37.5	27.6	10.35
16	CMS 911B	56	88	143.7	11.1	3.5	28.2	33	19.4	6.402
17	GMU 477	58	90	172.9	9.8	6.9	34.4	37.5	18.7	7.0125
18	GMU 450	57	89	137.8	12	4.8	41.5	38.3	19.6	7.5068
Block 2
1	COSFV 5	63	97	117.23	14.76	5.8	28.5	36.5	22.43	8.18695
2	PM 95	58	90	159.1	9.8	3.1	30.1	33	17.6	5.808
3	GMU 428	59	91	185.7	10.1	4.7	40.2	33.7	18.4	6.2008
4	GMU 411	58	90	159.8	9.3	4.5	32.7	34	17.4	5.916
5	GMU 741	61	93	143	8.8	3.2	34.9	33	18.4	6.072
6	CMS 108B	53	85	151.6	12.5	3	27	34	14.5	4.93
7	GMU 734	61	93	156.1	8.9	3.4	29.9	33.5	17.2	5.762
8	ARM 240B	59	91	124.8	7.8	1.6	35	34	15.5	5.27
9	CSFI 99 ©	62	96	125.3	12.7	4.2	31.3	35	18.86	6.601
10	CMS 597B	61	93	141.5	9.7	3.8	34.5	29.7	16.3	4.8411
11	HOCL 6R	51	83	118.4	10.1	3.5	32.4	32.7	19.2	6.2784
12	RHA GPR 110	57	89	148.1	12.1	4	28.5	33.5	20.6	6.901
13	IB 80	49	81	87.2	8.7	2.9	34.3	32.3	18.4	5.9432
14	CMS 107B	53	85	95.8	9	2	32.1	31.7	18.6	5.8962
15	PM 36	52	84	113	10.6	1.6	27.3	36	19	6.84
16	IL 77	58	90	137.4	8.6	2	31.5	29	17.4	5.046
17	RHA95-C-10	58	90	132	8.1	4	27.6	30.5	17.8	5.429
18	COSF 6B ©	62	96	86.03	10.33	5.6	32.5	39	22.5	8.775
Block3
1	CSFI 99 ©	61	95	129.13	11.93	4.2	34.5	33	25.9	8.547
2	IL84	53	85	145.6	7.3	3.1	28.7	30	15.5	4.65
3	RHA 278	59	91	61.5	7.1	5.3	29	35	17.8	6.23
4	RHA 273	69	101	111.9	5.6	5.9	35.4	34.5	12.6	4.347
5	RHA 857	54	86	65.6	6.3	2.3	36	31	16.8	5.208
6	GMU 755	60	92	131	9	3.9	24.7	29.1	19.3	5.6163
7	PM 53	56	88	143.5	10.9	4.2	29.7	30.7	18.4	5.6488
8	COSFV 5	62	96	115.5	14.1	6.2	32.5	37.5	30.8	11.55
9	GP6 912	52	84	141.6	10.6	5.5	41.9	28.7	18.6	5.3382
10	CMS 135B	53	85	75.8	6.3	5	35	32.5	13.8	4.485
11	REC 431	56	88	113.6	6.5	1.6	35	34.5	14.5	5.0025
12	GMU 325	53	85	95.7	6	3.2	28.3	27.3	12.5	3.4125
13	GP6 1089	54	86	95.5	6.6	3.3	31.1	26.6	12.5	3.325
14	RHA 378	52	84	87.4	7.1	2.6	28	36	15.2	5.472
15	PM 65	55	87	146.1	7.8	4.4	33.3	28.8	16.2	4.6656
16	RHA GMU 755	58	90	115.9	7.7	3.3	29.5	32.5	15.8	5.135
17	COSF 13B ©	56	88	116	15.6	4.2	24.9	37.5	24	9
18	COSF 6B ©	63	97	122.66	12	4.8	28.25	39	11.9	4.641
